# Supplementary material for: Menthol Pretreatment Alleviates Campylobacter jejuni-Induced Enterocolitis in Human Gut Microbiota-Associated IL-10−/− Mice
Source: MDPI journal article supplement (doi:10.3390/biom14030290), 2024-02-29
Supplement: s1 [file s1]

# Menthol pretreatment alleviates *Campylobacter jejuni* induced enterocolitis in human gut microbiota-associated IL-10<sup>-/-</sup> mice

Markus M. Heimesaat<sup>1‡</sup>, Luis Q. Langfeld<sup>1</sup>, Niklas Schabbel<sup>1</sup>, Nizar W. Shayya<sup>1</sup>, Soraya Mousavi<sup>1</sup>, Stefan Bereswill<sup>1</sup>

<sup>1</sup> Gastrointestinal Microbiology Research Group, Institute of Microbiology, Infectious Diseases and Immunology, Charité - Universitätsmedizin Berlin, corporate member of Freie Universität Berlin, Humboldt-Universität zu Berlin, and Berlin Institute of Health, Berlin, Germany

**Supplementary Table 1. Clinical scores (maximum 12 points).**

| Clinical aspect   | Scores                                                                                                                                              |
|-------------------|-----------------------------------------------------------------------------------------------------------------------------------------------------|
| Wasting symptoms  | 0: normal<br>1: ruffled fur<br>2: less locomotion<br>3: isolation<br>4: severely compromised locomotion, pre-final aspect                           |
| Stool consistency | 0: formed feces<br>2: pasty feces<br>4: liquid feces                                                                                                |
| Fecal blood       | 0: no blood<br>2: microscopic detection of blood by the Guajac method using Haemocult, Beckman Coulter/PCD, Germany<br>4: macroscopic blood visible |

**Supplementary Table 2: Histopathological scores (maximum 4 points).**

|         |                                                                                                                                             |
|---------|---------------------------------------------------------------------------------------------------------------------------------------------|
| Score 0 | Normal epithelium without inflammatory cell infiltrates.                                                                                    |
| Score 1 | Minimal inflammatory cell infiltrates in the mucosa with intact epithelium.                                                                 |
| Score 2 | Mild inflammatory cell infiltrates in the mucosa and submucosa with mild hyperplasia and mild goblet cell loss.                             |
| Score 3 | Moderate inflammatory cell infiltrates in the mucosa with moderate goblet cell loss.                                                        |
| Score 4 | Marked inflammatory cell infiltration into the mucosa and submucosa with marked goblet cell loss, multiple crypt abscesses, and crypt loss. |

**Supplementary Table 3: Primary antibodies for *in situ* immunohistochemical analyses**

| Cells                      | Primary antibody                                                      |
|----------------------------|-----------------------------------------------------------------------|
| Apoptotic epithelial cells | cleaved caspase-3 (Asp175, Cell Signaling, Beverly, MA, USA, 1:200)   |
| Macrophages/monocytes      | F4/80 (no. 14-4801, clone BM8, eBioscience, San Diego, CA, USA, 1:50) |
| Neutrophils                | MPO7 (No. A0398, Dako, Glostrup, Denmark, 1:500)                      |
| T lymphocytes              | CD3 (no. N1580, Dako, 1:10)                                           |
| B lymphocytes              | B220 (no. 14-0452-81, eBioscience, San Diego, CA, USA; 1:200).        |

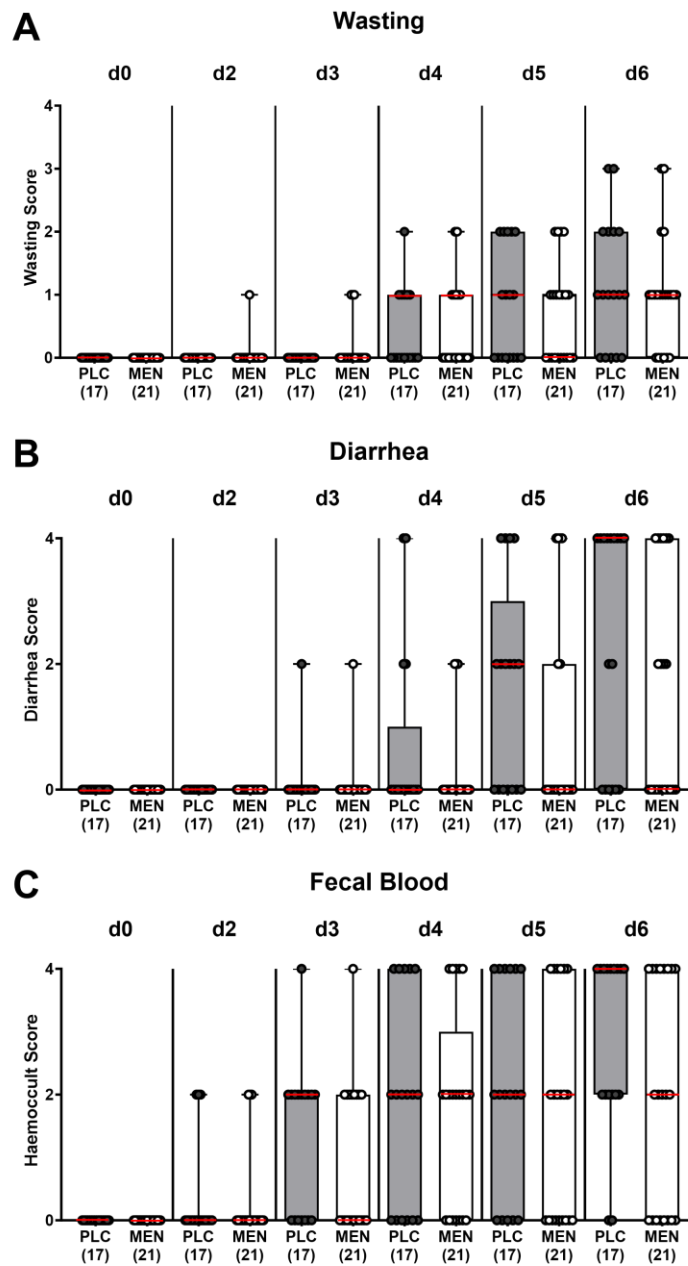

**Supplementary Figure S1. Clinical signs of campylobacteriosis over time following *C. jejuni* infection of hma IL-10<sup>-/-</sup> mice with menthol pre-treatment.** Hma IL-10<sup>-/-</sup> mice were orally pretreated with menthol (MEN, white bars) or placebo (PLC, grey bars) and infected with *C. jejuni* on day 0 (d0) and d1 by gavage. The clinical signs of campylobacteriosis such as **(A)** wasting symptoms, **(B)** diarrhea, and **(C)** fecal blood were recorded with individual scores (see methods). Box plots (25<sup>th</sup> and 75<sup>th</sup> percentiles), whiskers (minimum and maximum values), medians (red bar in boxes), and numbers of analyzed mice (in parentheses) from three experiments are given.

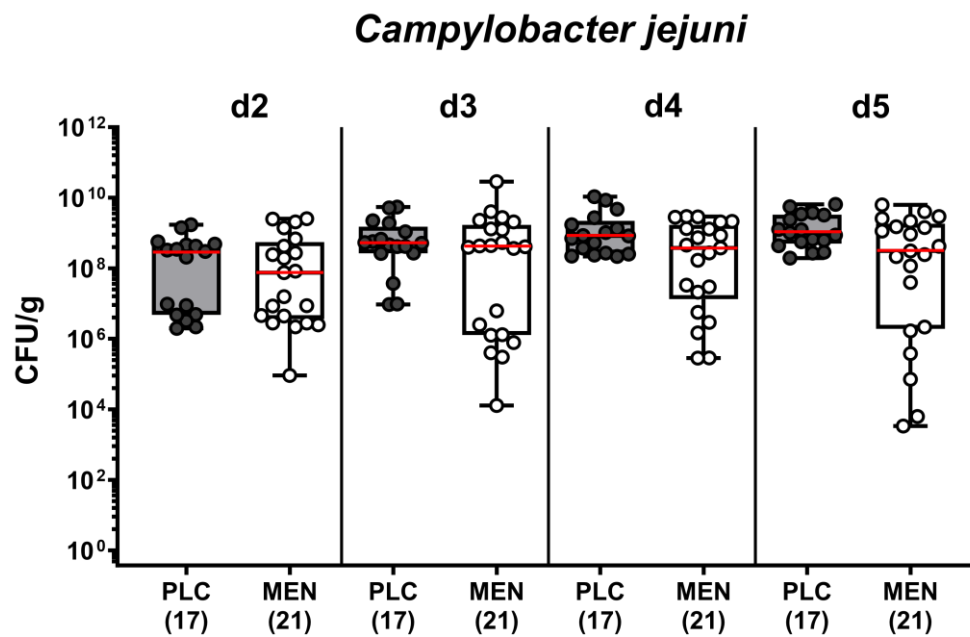

**Supplementary Figure S2. Pathogen numbers in fecal samples taken following *C. jejuni* infection of hma IL-10<sup>-/-</sup> mice with menthol pre-treatment.** Hma IL-10<sup>-/-</sup> mice were orally pretreated with menthol (MEN, white bars) or placebo (PLC, grey bars) and infected with *C. jejuni* on day 0 (d0) and d1 by gavage. The fecal *C. jejuni* numbers were determined at defined time points post-infection by culture. Box plots (25<sup>th</sup> and 75<sup>th</sup> percentiles), whiskers (minimum and maximum values), medians (red bar in boxes), and numbers of analyzed mice (in parentheses) from three experiments are given. CFU, colony-forming units.

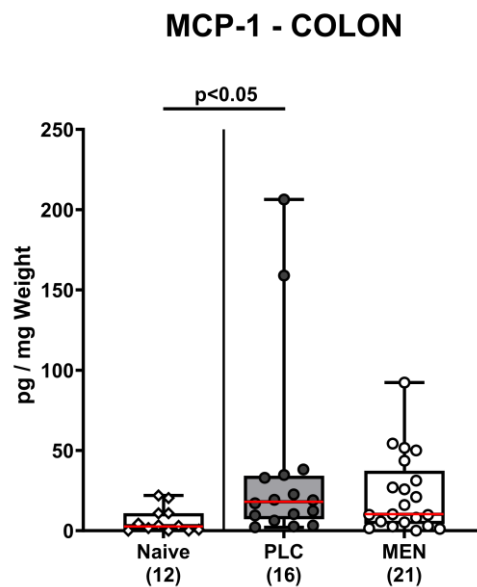

**Supplementary Figure S3. Colonic MCP-1 secretion in *C. jejuni* infected hma IL-10<sup>-/-</sup> mice with menthol pretreatment.** Hma IL-10<sup>-/-</sup> mice were orally pretreated with menthol (MEN, white bars) or placebo (PLC, grey bars) and infected with *C. jejuni* on days 0 and 1 by gavage. On day 6 post-infection, MCP-1 concentrations were measured in *ex vivo* biopsies sampled from the colon. Naive mice (non-infected without pretreatment) served as negative controls. Box plots (25<sup>th</sup> and 75<sup>th</sup> percentiles), whiskers (minimum and maximum values), medians (red bar in boxes), significance levels (p values) determined by the Kruskal-Wallis test with Dunn's post hoc test, and numbers of analyzed mice (in parentheses) from three experiments are given. The Grubb's test was used to identify definite outliers.
